# Supplementary material
Source: PubMed Central journal article supplement (PMC2755695)
Supplement: supp_M109.018580_jbc.M109.018580-2.pdf [file supp_M109.018580_jbc.M109.018580-2.pdf]

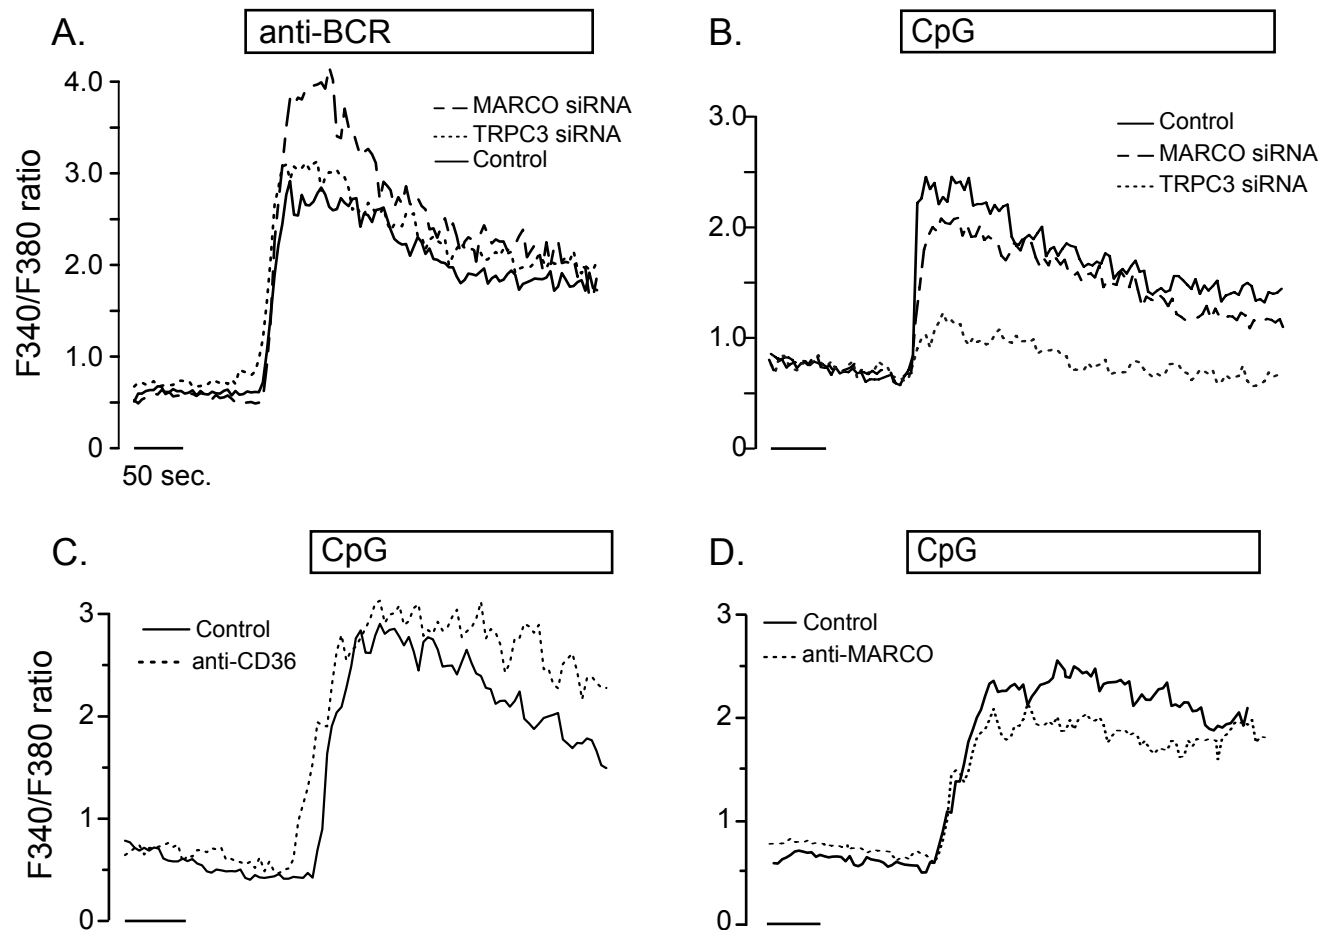

Figure S2. CpG induced calcium signals are not mediated by MARCO or CD36. A. BCR-induced calcium signals are indistinguishable in control B cells versus TRPC3 or MARCO suppressed cells. B. TRPC3 but not MARCO is required for CpG-induced calcium signaling in primary B lymphocytes. Neither anti-CD36 (C) nor anti-MARCO antibody treatment (D) inhibited CpG-induced calcium signaling in primary B cells.
